# Supplementary material
Source: PubMed Central journal article supplement (PMC9586458)
Supplement: NIHMS1805540-supplement-1.pdf [file NIHMS1805540-supplement-1.pdf]

## **eAppendix Table of Contents**

**Table 1:** Percentage of Enrollees who Switched Insurance or Disenrolled After Newly Enrolling in Medicare Advantage

**Figure 1 and Table 2:** Proportion of Enrollees who Changed Insurance After Newly Enrolling in Medicare Advantage, Stratified by Dual-Eligible Status

**Figure 2 and Table 3:** Proportion of Enrollees who Changed Insurance After Newly Enrolling in Medicare Advantage, Stratified by Prior Enrollment Status

**Table 4:** Demographics of New Medicare Advantage Enrollees After Three Years of Enrollment, 2012-14 Cohorts

**Note 1:** Comparison of Voluntary Switching Rates Between Jacobson et al. and Our Study

**eAppendix Table 1: Percentage of Enrollees who Switched Insurance or Disenrolled After Newly Enrolling in Medicare Advantage**

|                                               | Years After Joining MA |              |              |              |              |
|-----------------------------------------------|------------------------|--------------|--------------|--------------|--------------|
|                                               | 1                      | 2            | 3            | 4            | 5            |
| <b><i>Voluntarily Switched</i></b>            |                        |              |              |              |              |
| Enrolled in 2012                              | 7.1%                   | 13.6%        | 18.2%        | 20.9%        | 22.9%        |
| Enrolled in 2013                              | 8.2%                   | 14.7%        | 18.3%        | 20.9%        |              |
| Enrolled in 2014                              | 7.6%                   | 12.9%        | 16.6%        |              |              |
| Enrolled in 2015                              | 6.4%                   | 11.7%        |              |              |              |
| Enrolled in 2016                              | 6.5%                   |              |              |              |              |
| <b>All Years</b>                              | <b>7.1%</b>            | <b>13.2%</b> | <b>17.7%</b> | <b>20.9%</b> | <b>22.9%</b> |
| <b><i>Voluntarily Disenrolled</i></b>         |                        |              |              |              |              |
| Enrolled in 2012                              | 4.3%                   | 6.9%         | 8.8%         | 10.1%        | 11.0%        |
| Enrolled in 2013                              | 4.7%                   | 7.4%         | 9.2%         | 10.5%        |              |
| Enrolled in 2014                              | 4.8%                   | 7.5%         | 9.3%         |              |              |
| Enrolled in 2015                              | 5.1%                   | 7.7%         |              |              |              |
| Enrolled in 2016                              | 4.8%                   |              |              |              |              |
| <b>All Years</b>                              | <b>4.8%</b>            | <b>7.4%</b>  | <b>9.1%</b>  | <b>10.3%</b> | <b>11.0%</b> |
| <b><i>Involuntarily Switched</i></b>          |                        |              |              |              |              |
| Enrolled in 2012                              | 4.8%                   | 6.7%         | 9.2%         | 9.9%         | 10.3%        |
| Enrolled in 2013                              | 2.0%                   | 5.0%         | 6.0%         | 6.5%         |              |
| Enrolled in 2014                              | 1.8%                   | 3.2%         | 4.1%         |              |              |
| Enrolled in 2015                              | 1.3%                   | 2.6%         |              |              |              |
| Enrolled in 2016                              | 1.4%                   |              |              |              |              |
| <b>All Years</b>                              | <b>2.3%</b>            | <b>4.4%</b>  | <b>6.4%</b>  | <b>8.2%</b>  | <b>10.3%</b> |
| <b><i>Involuntarily Disenrolled</i></b>       |                        |              |              |              |              |
| Enrolled in 2012                              | 1.2%                   | 1.7%         | 2.3%         | 2.5%         | 2.6%         |
| Enrolled in 2013                              | 0.7%                   | 1.4%         | 1.7%         | 1.9%         |              |
| Enrolled in 2014                              | 0.4%                   | 0.9%         | 1.2%         |              |              |
| Enrolled in 2015                              | 0.5%                   | 1.0%         |              |              |              |
| Enrolled in 2016                              | 0.5%                   |              |              |              |              |
| <b>All Years</b>                              | <b>0.7%</b>            | <b>1.2%</b>  | <b>1.7%</b>  | <b>2.2%</b>  | <b>2.6%</b>  |
| <b><i>Switched after Moving</i></b>           |                        |              |              |              |              |
| Enrolled in 2012                              | 0.8%                   | 1.4%         | 1.8%         | 2.1%         | 2.4%         |
| Enrolled in 2013                              | 0.8%                   | 1.4%         | 1.8%         | 2.1%         |              |
| Enrolled in 2014                              | 0.8%                   | 1.4%         | 1.8%         |              |              |
| Enrolled in 2015                              | 0.8%                   | 1.4%         |              |              |              |
| Enrolled in 2016                              | 0.8%                   |              |              |              |              |
| <b>All Years</b>                              | <b>0.8%</b>            | <b>1.4%</b>  | <b>1.8%</b>  | <b>2.1%</b>  | <b>2.4%</b>  |
| <b><i>Combined Switch &amp; Disenroll</i></b> |                        |              |              |              |              |
| Enrolled in 2012                              | 18.3%                  | 30.4%        | 40.3%        | 45.4%        | 49.2%        |
| Enrolled in 2013                              | 16.3%                  | 29.9%        | 37.0%        | 41.9%        |              |
| Enrolled in 2014                              | 15.5%                  | 25.9%        | 33.0%        |              |              |
| Enrolled in 2015                              | 14.1%                  | 24.3%        |              |              |              |
| Enrolled in 2016                              | 14.0%                  |              |              |              |              |
| <b>All Years</b>                              | <b>15.6%</b>           | <b>27.6%</b> | <b>36.8%</b> | <b>43.7%</b> | <b>49.2%</b> |

**eAppendix Figure 1 and Table 2: Proportion of Enrollees who Changed Insurance After Newly Enrolling in Medicare Advantage, Stratified by Dual-Eligible Status**

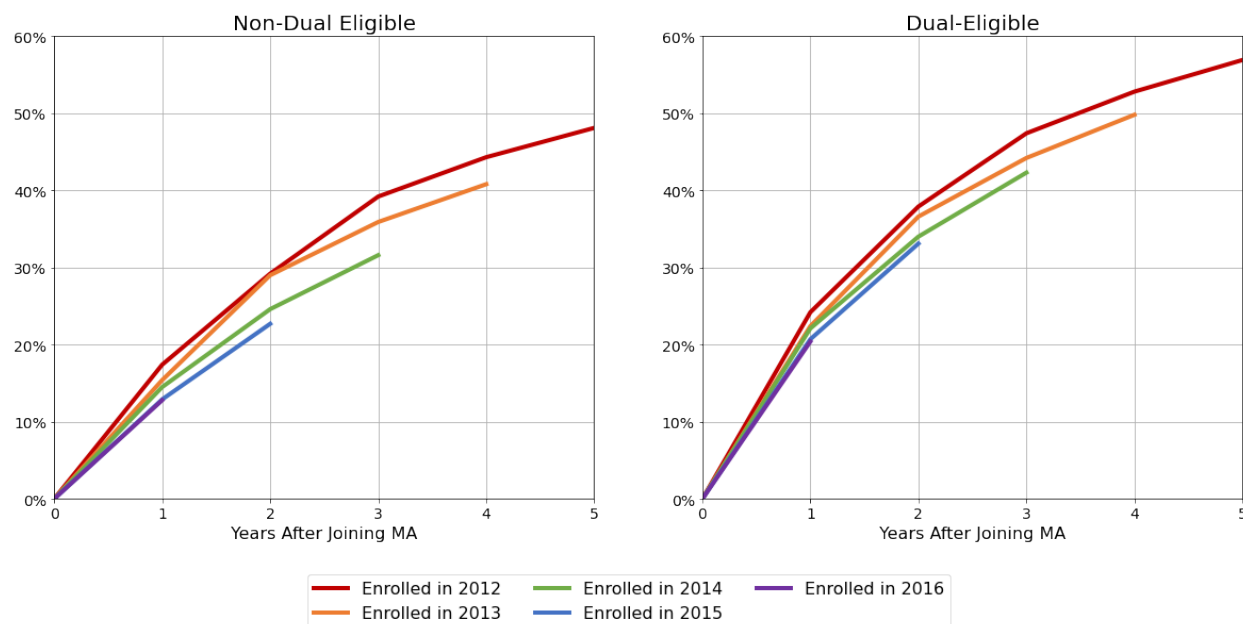

|                                 | Years After Joining MA |              |              |              |              |
|---------------------------------|------------------------|--------------|--------------|--------------|--------------|
|                                 | 1                      | 2            | 3            | 4            | 5            |
| <b><i>Non-Dual Eligible</i></b> |                        |              |              |              |              |
| Enrolled in 2012                | 17.4%                  | 29.2%        | 39.2%        | 44.3%        | 48.1%        |
| Enrolled in 2013                | 15.4%                  | 29.0%        | 35.9%        | 40.8%        |              |
| Enrolled in 2014                | 14.5%                  | 24.6%        | 31.6%        |              |              |
| Enrolled in 2015                | 12.9%                  | 22.7%        |              |              |              |
| Enrolled in 2016                | 12.8%                  |              |              |              |              |
| <b>All Years</b>                | <b>14.6%</b>           | <b>26.4%</b> | <b>35.6%</b> | <b>42.5%</b> | <b>48.1%</b> |
| <b><i>Dual-Eligible</i></b>     |                        |              |              |              |              |
| Enrolled in 2012                | 24.2%                  | 37.9%        | 47.4%        | 52.8%        | 56.9%        |
| Enrolled in 2013                | 22.4%                  | 36.6%        | 44.2%        | 49.8%        |              |
| Enrolled in 2014                | 22.1%                  | 34.0%        | 42.3%        |              |              |
| Enrolled in 2015                | 20.7%                  | 33.1%        |              |              |              |
| Enrolled in 2016                | 20.4%                  |              |              |              |              |
| <b>All Years</b>                | <b>22.0%</b>           | <b>35.4%</b> | <b>44.6%</b> | <b>51.3%</b> | <b>56.9%</b> |

**eAppendix Figure 2 and Table 3: Proportion of Enrollees who Changed Insurance After Newly Enrolling in Medicare Advantage, Stratified by Prior Enrollment Status**

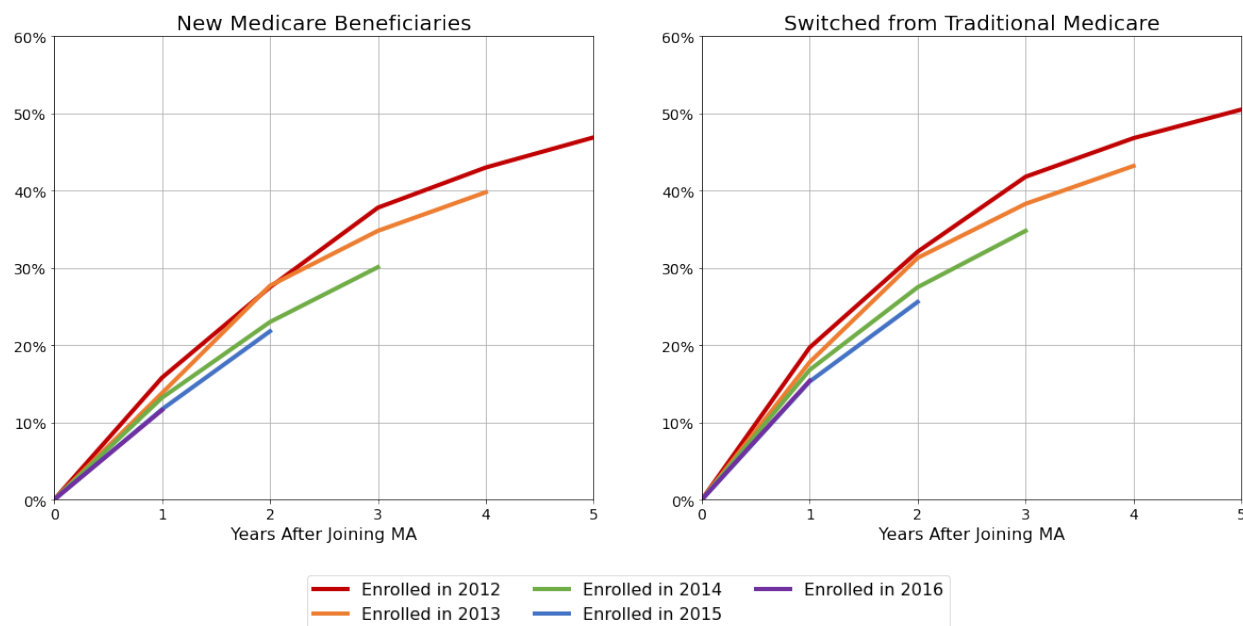

|                                                  | Years After Joining MA |              |              |              |              |
|--------------------------------------------------|------------------------|--------------|--------------|--------------|--------------|
|                                                  | 1                      | 2            | 3            | 4            | 5            |
| <b><i>New Medicare Beneficiaries</i></b>         |                        |              |              |              |              |
| Enrolled in 2012                                 | 15.8%                  | 27.5%        | 37.8%        | 43.0%        | 46.9%        |
| Enrolled in 2013                                 | 13.8%                  | 27.7%        | 34.8%        | 39.8%        |              |
| Enrolled in 2014                                 | 13.2%                  | 23.0%        | 30.1%        |              |              |
| Enrolled in 2015                                 | 11.7%                  | 21.8%        |              |              |              |
| Enrolled in 2016                                 | 11.6%                  |              |              |              |              |
| <b>All Years</b>                                 | <b>13.2%</b>           | <b>25.0%</b> | <b>34.2%</b> | <b>41.4%</b> | <b>46.9%</b> |
| <b><i>Switched from Traditional Medicare</i></b> |                        |              |              |              |              |
| Enrolled in 2012                                 | 19.7%                  | 32.1%        | 41.8%        | 46.8%        | 50.5%        |
| Enrolled in 2013                                 | 17.8%                  | 31.3%        | 38.3%        | 43.2%        |              |
| Enrolled in 2014                                 | 16.8%                  | 27.5%        | 34.8%        |              |              |
| Enrolled in 2015                                 | 15.3%                  | 25.6%        |              |              |              |
| Enrolled in 2016                                 | 15.4%                  |              |              |              |              |
| <b>All Years</b>                                 | <b>17.0%</b>           | <b>29.1%</b> | <b>38.3%</b> | <b>45.0%</b> | <b>50.5%</b> |

**eAppendix Table 4: Demographics of New Medicare Advantage Enrollees After Three Years of Enrollment, 2012-14 Cohorts**

|                                           | <b>Stayed</b> | <b>Voluntarily Switched MA Plans</b> | <b>Voluntarily Disenrolled to TM</b> | <b>Involuntarily Switched or Disenrolled</b> |
|-------------------------------------------|---------------|--------------------------------------|--------------------------------------|----------------------------------------------|
| N                                         | 2,150,395     | 675,601                              | 345,467                              | 317,083                                      |
| Age ( <i>mean and SD</i> )                | 66.1 (8.1)    | 66.1 (8.3)                           | 65.8 (10.5)                          | 65.9 (9.2)                                   |
| Female                                    | 53.9%         | 54.9%                                | 54.0%                                | 53.0%                                        |
| Non-White                                 | 28.1%         | 32.7%                                | 28.7%                                | 31.0%                                        |
| Switched from TM                          | 59.9%         | 63.2%                                | 71.8%                                | 64.8%                                        |
| Dual-Eligible                             | 10.7%         | 15.4%                                | 19.3%                                | 12.5%                                        |
| Rural                                     | 12.7%         | 8.8%                                 | 15.1%                                | 23.3%                                        |
| Chronic conditions ( <i>mean and SD</i> ) | 3.2 (3.3)     | 3.7 (3.5)                            | 4.5 (3.8)                            | 3.6 (3.5)                                    |

Chronic conditions were calculated only from enrollees previously enrolled in TM as data was not otherwise available.

**eAppendix Note 1: Comparison of Voluntary Switching Rates Between Jacobson et al. and Our Study**

One prior study which examined insurance change in MA is Jacobson et al (reference 11). Since Jacobson et al. measured plan-level switching rather than insurance-level switching, one needs to know the fraction of enrollees who also changed insurance among those who changed plans. The only segment for which data is available are enrollees who voluntarily switched plans between 2013-14. Jacobson et al. found that 11% of all MA enrollees voluntarily switched plans, of which 71% also switched insurers, meaning that 7.8% of enrollees voluntarily switched insurers. In comparison, we found that 7.6% of new MA enrollees voluntarily switched insurers. We do note that we labeled those who switched after moving under a different category, whereas it is unclear how those enrollees were treated in Jacobson et al.
